# Supplementary material for: Risk Factors for Mortality in Adult COVID-19 Patients Who Develop Bloodstream Infections Mostly Caused by Antimicrobial-Resistant Organisms: Analysis at a Large Teaching Hospital in Italy
Source: MDPI journal article supplement (doi:10.3390/jcm10081752), 2021-04-17
Supplement: s1 [file s1]

**Table S1.** Summary of microbiological characteristics of bloodstream infection episodes with or without an identified pulmonary source in 46 patients studied

| Patient identifier | Episode characteristics |                                                                                                                 | Episode-related pulmonary source characteristics |                                                                                                                                                |
|--------------------|-------------------------|-----------------------------------------------------------------------------------------------------------------|--------------------------------------------------|------------------------------------------------------------------------------------------------------------------------------------------------|
|                    | Episode identifier      | Microbial species (antimicrobial resistance determinant identified)                                             | Episode identifier                               | Microbial species (antimicrobial resistance determinant identified)                                                                            |
| 1                  | 1.1                     | <i>Enterococcus faecalis</i> + <i>Proteus mirabilis</i>                                                         |                                                  |                                                                                                                                                |
| 2                  | 2.1                     | <i>Escherichia coli</i> ( <i>bla</i> <sub>CTX-M-15</sub> )                                                      |                                                  |                                                                                                                                                |
| 3                  | 3.1                     | <i>Staphylococcus aureus</i> ( <i>mecA</i> )                                                                    |                                                  |                                                                                                                                                |
| 4                  | 4.1                     | <i>Staphylococcus aureus</i> ( <i>mecA</i> )                                                                    |                                                  |                                                                                                                                                |
| 5                  | 5.1                     | <i>Klebsiella pneumoniae</i> ( <i>bla</i> <sub>CTX-M-15</sub> )                                                 |                                                  |                                                                                                                                                |
| 6                  | 6.1                     | <i>Enterococcus faecalis</i> + <i>Klebsiella pneumoniae</i> ( <i>bla</i> <sub>KPC</sub> )                       | 6.1                                              | <i>Klebsiella pneumoniae</i> ( <i>bla</i> <sub>KPC</sub> )                                                                                     |
| 7                  | 7.1                     | <i>Staphylococcus aureus</i>                                                                                    |                                                  |                                                                                                                                                |
| 8                  | 8.1                     | <i>Enterococcus faecium</i>                                                                                     |                                                  |                                                                                                                                                |
| 9                  | 9.1                     | <i>Staphylococcus aureus</i> ( <i>mecA</i> )                                                                    |                                                  |                                                                                                                                                |
| 10                 | 10.1                    | <i>Pseudomonas aeruginosa</i>                                                                                   | 10.1                                             | <i>Pseudomonas aeruginosa</i>                                                                                                                  |
| 11                 | 11.1                    | <i>Escherichia coli</i>                                                                                         |                                                  |                                                                                                                                                |
| 12                 | 12.1                    | <i>Candida parapsilosis</i>                                                                                     |                                                  |                                                                                                                                                |
| 13                 | 13.1                    | <i>Staphylococcus epidermidis</i>                                                                               |                                                  |                                                                                                                                                |
| 14                 | 14.1                    | <i>Enterococcus faecalis</i>                                                                                    |                                                  |                                                                                                                                                |
| 15                 | 15.1                    | <i>Enterococcus faecalis</i> + <i>Streptococcus oralis</i> , <i>Candida krusei</i>                              |                                                  |                                                                                                                                                |
| 16                 | 16.1                    | <i>Proteus mirabilis</i>                                                                                        |                                                  |                                                                                                                                                |
| 17                 | 17.1                    | <i>Klebsiella pneumoniae</i> ( <i>bla</i> <sub>KPC</sub> )                                                      | 17.1                                             | <i>Klebsiella pneumoniae</i> ( <i>bla</i> <sub>KPC</sub> )                                                                                     |
| 18                 | 18.1                    | <i>Staphylococcus aureus</i> ( <i>mecA</i> )                                                                    |                                                  |                                                                                                                                                |
| 19                 | 19.1                    | <i>Staphylococcus aureus</i> ( <i>mecA</i> )                                                                    | 19.1                                             | <i>Acinetobacter baumannii</i> ( <i>bla</i> <sub>OXA-23</sub> ) + <i>Pseudomonas aeruginosa</i> + <i>Staphylococcus aureus</i> ( <i>mecA</i> ) |
| 20                 | 20.1                    | <i>Candida albicans</i> + <i>Candida glabrata</i>                                                               |                                                  |                                                                                                                                                |
| 21                 | 21.1                    | <i>Staphylococcus aureus</i> + <i>Streptococcus anginosus</i> + <i>Streptococcus oralis</i>                     | 21.1                                             | <i>Staphylococcus aureus</i>                                                                                                                   |
|                    | 21.2                    | <i>Pseudomonas aeruginosa</i>                                                                                   |                                                  |                                                                                                                                                |
| 22                 | 22.1                    | <i>Staphylococcus epidermidis</i>                                                                               |                                                  |                                                                                                                                                |
| 23                 | 23.1                    | <i>Staphylococcus aureus</i> ( <i>mecA</i> )                                                                    |                                                  |                                                                                                                                                |
| 24                 | 24.1                    | <i>Staphylococcus aureus</i> ( <i>mecA</i> )                                                                    |                                                  |                                                                                                                                                |
| 25                 | 25.1                    | <i>Bacteroides fragilis</i>                                                                                     |                                                  |                                                                                                                                                |
| 26                 | 26.1                    | <i>Enterococcus faecalis</i>                                                                                    |                                                  |                                                                                                                                                |
| 27                 | 27.1                    | <i>Enterococcus faecalis</i>                                                                                    |                                                  |                                                                                                                                                |
| 28                 | 28.1                    | <i>Pseudomonas aeruginosa</i>                                                                                   | 28.1                                             | <i>Pseudomonas aeruginosa</i>                                                                                                                  |
|                    | 28.2                    | <i>Staphylococcus aureus</i> ( <i>mecA</i> )                                                                    | 28.2                                             | <i>Staphylococcus aureus</i> ( <i>mecA</i> )                                                                                                   |
| 29                 | 29.1                    | <i>Klebsiella pneumoniae</i> + <i>Staphylococcus aureus</i>                                                     | 29.1                                             | <i>Klebsiella pneumoniae</i> + <i>Staphylococcus aureus</i>                                                                                    |
| 30                 | 30.1                    | <i>Streptococcus pneumoniae</i>                                                                                 | 30.1                                             | <i>Streptococcus pneumoniae</i>                                                                                                                |
|                    | 30.2                    | <i>Candida albicans</i>                                                                                         |                                                  |                                                                                                                                                |
| 31                 | 31.1                    | <i>Staphylococcus aureus</i> ( <i>mecA</i> )                                                                    |                                                  |                                                                                                                                                |
|                    | 31.2                    | <i>Morganella morganii</i>                                                                                      |                                                  |                                                                                                                                                |
|                    | 31.3                    | <i>Candida glabrata</i>                                                                                         |                                                  |                                                                                                                                                |
|                    | 31.4                    | <i>Acinetobacter baumannii</i> ( <i>bla</i> <sub>OXA-23</sub> ) + <i>Candida glabrata</i> (mutated <i>FKS</i> ) |                                                  |                                                                                                                                                |
| 32                 | 32.1                    | <i>Enterococcus faecium</i> ( <i>vanA</i> )                                                                     | 32.1                                             | <i>Enterococcus faecium</i> ( <i>vanA</i> )                                                                                                    |
| 33                 | 33.1                    | <i>Enterococcus faecalis</i> + <i>Staphylococcus aureus</i> ( <i>mecA</i> )                                     |                                                  |                                                                                                                                                |
| 34                 | 34.1                    | <i>Staphylococcus aureus</i> ( <i>mecA</i> )                                                                    | 34.1                                             | <i>Klebsiella pneumoniae</i> + <i>Staphylococcus aureus</i> ( <i>mecA</i> )                                                                    |
|                    | 34.2                    | <i>Stenotrophomonas maltophilia</i>                                                                             |                                                  |                                                                                                                                                |
| 35                 | 35.1                    | <i>Staphylococcus aureus</i>                                                                                    | 35.1                                             | <i>Staphylococcus aureus</i>                                                                                                                   |
| 36                 | 36.1                    | <i>Staphylococcus aureus</i> ( <i>mecA</i> )                                                                    | 36.1                                             | <i>Staphylococcus aureus</i> ( <i>mecA</i> )                                                                                                   |
| 37                 | 37.1                    | <i>Streptococcus pneumoniae</i>                                                                                 | 37.1                                             | <i>Citrobacter koseri</i> + <i>Streptococcus pneumoniae</i>                                                                                    |
| 38                 | 38.1                    | <i>Pseudomonas aeruginosa</i>                                                                                   | 38.1                                             | <i>Pseudomonas aeruginosa</i>                                                                                                                  |
|                    | 38.2                    | <i>Enterococcus faecalis</i>                                                                                    |                                                  |                                                                                                                                                |
| 39                 | 39.1                    | <i>Enterococcus faecalis</i>                                                                                    |                                                  |                                                                                                                                                |
| 40                 | 40.1                    | <i>Staphylococcus aureus</i> ( <i>mecA</i> )                                                                    | 40.1                                             | <i>Staphylococcus aureus</i> ( <i>mecA</i> )                                                                                                   |
| 41                 | 41.1                    | <i>Staphylococcus aureus</i> ( <i>mecA</i> )                                                                    |                                                  |                                                                                                                                                |
|                    | 41.2                    | <i>Candida albicans</i>                                                                                         |                                                  |                                                                                                                                                |
| 42                 | 42.1                    | <i>Candida parapsilosis</i>                                                                                     |                                                  |                                                                                                                                                |
|                    | 42.2                    | <i>Klebsiella pneumoniae</i> ( <i>bla</i> <sub>KPC</sub> )                                                      | 42.2                                             | <i>Klebsiella pneumoniae</i> ( <i>bla</i> <sub>KPC</sub> ) + <i>Pseudomonas aeruginosa</i>                                                     |
| 43                 | 43.1                    | <i>Enterococcus faecalis</i>                                                                                    |                                                  |                                                                                                                                                |
| 44                 | 44.1                    | <i>Acinetobacter baumannii</i> ( <i>bla</i> <sub>OXA-23</sub> )                                                 | 44.1                                             | <i>Acinetobacter baumannii</i> ( <i>bla</i> <sub>OXA-23</sub> ) + <i>Klebsiella pneumoniae</i> ( <i>bla</i> <sub>KPC</sub> )                   |
| 45                 | 45.1                    | <i>Pseudomonas aeruginosa</i>                                                                                   | 45.1                                             | <i>Pseudomonas aeruginosa</i>                                                                                                                  |
|                    | 45.2                    | <i>Bacteroides fragilis</i> + <i>Proteus mirabilis</i>                                                          |                                                  |                                                                                                                                                |
| 46                 | 46.1                    | <i>Staphylococcus aureus</i> ( <i>mecA</i> )                                                                    | 46.1                                             | <i>Staphylococcus aureus</i> ( <i>mecA</i> ) + <i>Stenotrophomonas maltophilia</i>                                                             |
|                    | 46.2                    | <i>Pseudomonas aeruginosa</i>                                                                                   |                                                  |                                                                                                                                                |

**Table S2.** Etiology, type and source of 58 bloodstream infection episodes included in the study

| Microbial species (no. of isolates)                                     | No. (%) of episodes  |                                |                               | No. (%) of episodes with a respiratory source ( <i>n</i> = 20) |
|-------------------------------------------------------------------------|----------------------|--------------------------------|-------------------------------|----------------------------------------------------------------|
|                                                                         | All ( <i>n</i> = 58) | Monomicrobial ( <i>n</i> = 49) | Polymicrobial ( <i>n</i> = 9) |                                                                |
| Gram-positive organisms (38) <sup>a</sup>                               |                      |                                |                               |                                                                |
| <i>Staphylococcus aureus</i> (19)                                       | 19 (32.8)            | 16 (32.7)                      | 3 (33.3)                      | 9 (45.0)                                                       |
| Methicillin-resistant <i>S. aureus</i> (15)                             | 15 (25.9)            | 14 (28.6)                      | 1 (11.1)                      |                                                                |
| Coagulase-negative <i>Staphylococcus</i> species (2)                    | 2 (3.5)              | 2 (4.1)                        |                               |                                                                |
| <i>Enterococcus faecalis</i> (10)                                       | 10 (17.2)            | 6 (12.2)                       | 4 (44.4)                      |                                                                |
| <i>Enterococcus faecium</i> (2)                                         | 2 (3.5)              | 2 (4.1)                        |                               | 1 (5.0)                                                        |
| Vancomycin-resistant <i>E. faecium</i> (1)                              | 1 (1.7)              | 1 (2.0)                        |                               | 1 (5.0)                                                        |
| <i>Streptococcus</i> species (5)                                        | 4 (6.9)              | 2 (4.1)                        | 2 (22.2) <sup>b</sup>         | 2 (10.0)                                                       |
| Gram-negative organisms (22) <sup>a</sup>                               |                      |                                |                               |                                                                |
| Enterobacterales (12)                                                   | 12 (20.7)            | 8 (16.3)                       | 4 (44.4)                      | 4 (20.0)                                                       |
| Third-generation cephalosporin-resistant Enterobacterales (2)           | 2 (3.5)              | 2 (4.1)                        |                               |                                                                |
| Carbapenem-resistant Enterobacterales (3)                               | 3 (5.2)              | 2 (4.1)                        | 1 (11.1)                      |                                                                |
| <i>Pseudomonas aeruginosa</i> (6)                                       | 6 (10.3)             | 6 (12.2)                       |                               | 4 (20.0)                                                       |
| Antipseudomonal cephalosporin-resistant <i>P. aeruginosa</i> (1)        | 1 (1.7)              | 1 (2.0)                        |                               | 1 (5.0)                                                        |
| Antipseudomonal carbapenem-resistant <i>P. aeruginosa</i> (2)           | 2 (3.5)              | 2 (4.1)                        |                               |                                                                |
| <i>Acinetobacter baumannii</i> (2)                                      | 2 (3.4)              | 1 (2.0)                        | 1 (11.1)                      | 1 (5.0)                                                        |
| Extensively drug-resistant carbapenem-resistant <i>A. baumannii</i> (2) | 2 (3.4)              | 1 (2.0)                        | 1 (11.1)                      |                                                                |
| <i>Bacteroides fragilis</i> (2)                                         | 2 (3.4)              | 1 (2.0)                        | 1 (11.1)                      |                                                                |
| Yeast organisms (9) <sup>a</sup>                                        |                      |                                |                               |                                                                |
| <i>Candida</i> species (9)                                              | 8 (13.8)             | 5 (10.2)                       | 3 (33.3) <sup>b</sup>         |                                                                |
| Echinocandin-resistant <i>Candida glabrata</i> (1)                      | 1 (1.7)              |                                | 1 (11.1)                      |                                                                |

<sup>a</sup> Detection of antimicrobial-resistance associated genes (within parentheses) was used to confirm antimicrobial-resistant phenotypes for methicillin-resistant *S. aureus* (*mecA*), vancomycin-resistant *E. faecium* (*vanA*), third-generation cephalosporin-resistant Enterobacterales (*bla*<sub>CTX-M-15</sub>), carbapenem-resistant Enterobacterales (*bla*<sub>KPC</sub>), carbapenem-resistant *A. baumannii* (*bla*<sub>OXA-23</sub>), and echinocandin-resistant *C. glabrata* (mutated *FKS*) using previously described methods.<sup>19,20</sup>

<sup>b</sup> Two isolates (1 *Streptococcus* species and 1 *Candida* species) from two polymicrobial episodes for which another 1 *Streptococcus* species and 1 *Candida* species were respectively isolated are not listed. Accordingly, total number of isolates from the polymicrobial episodes was 20 and not 18 (as opportunely reported).

**Table S3.** Details about the empirical antimicrobial therapy in COVID-19 patients with or without bloodstream infection (BSI)<sup>a</sup>

| Antimicrobial drug used     | Patients with BSI (n = 46) who received    |                       |                                                                                                                                       | Patients without BSI (n = 50) who received |
|-----------------------------|--------------------------------------------|-----------------------|---------------------------------------------------------------------------------------------------------------------------------------|--------------------------------------------|
|                             | Any (appropriate or inappropriate) therapy | Inappropriate therapy | Reason(s) for inappropriate therapy                                                                                                   | Any therapy                                |
| Amoxicillin/clavulanic acid | 1                                          | —                     | —                                                                                                                                     | 0                                          |
| Carbapenems                 |                                            |                       |                                                                                                                                       |                                            |
| Alone                       | 4                                          | 4                     | 1 <i>E. faecium</i> , 1 <i>bla</i> <sub>KPC</sub> positive <i>K. pneumoniae</i> , 1 MRSA, 1 carbapenem-resistant <i>P. aeruginosa</i> | 1                                          |
| Plus daptomycin             | 1                                          | —                     | —                                                                                                                                     | 0                                          |
| Plus linezolid              | 7                                          | —                     | —                                                                                                                                     | 0                                          |
| Plus vancomycin             | 2                                          | —                     | —                                                                                                                                     | 1                                          |
| Ceftazidime                 | 1                                          | —                     | —                                                                                                                                     | 0                                          |
| Ceftriaxone                 |                                            |                       |                                                                                                                                       |                                            |
| Alone                       | 0                                          | —                     | —                                                                                                                                     | 4                                          |
| Plus azithromycin           | 0                                          | —                     | —                                                                                                                                     | 15                                         |
| Piperacillin/tazobactam     |                                            |                       |                                                                                                                                       |                                            |
| Alone                       | 3                                          | 2                     | 1 <i>bla</i> <sub>CTX-M-15</sub> positive <i>E. coli</i> , 1 MRSA                                                                     | 6                                          |
| Plus linezolid              | 5                                          | 1                     | 1 <i>bla</i> <sub>OXA-23</sub> positive <i>A. baumannii</i>                                                                           | 2                                          |
| Plus vancomycin             | 6                                          | —                     | —                                                                                                                                     | 1                                          |
| Vancomycin                  | 1                                          | —                     | —                                                                                                                                     | 0                                          |
| Any drug                    | 31                                         | 7                     | See above reasons                                                                                                                     | 30                                         |

<sup>a</sup> Fifty patients were random selected from those included in the study (*n* = 215) and used as a comparator group. Fifteen of 46 patients with BSI and 20 of 50 patients without BSI were untreated at the time of first blood culture collection.

**Table S4.** Predictive factors for survival in COVID-19 patients with bloodstream infection

|                                                  | Kaplan-Meier analysis            |                                     |                | Univariable Cox regression analysis |                | Multivariable Cox regression analysis |                |
|--------------------------------------------------|----------------------------------|-------------------------------------|----------------|-------------------------------------|----------------|---------------------------------------|----------------|
|                                                  | No. of death<br>( <i>n</i> = 20) | Percent of<br>survival <sup>a</sup> | <i>P</i> value | Hazard ratio (95% CI)               | <i>P</i> value | Hazard ratio (95% CI)                 | <i>P</i> value |
| Age, years                                       |                                  |                                     |                |                                     |                |                                       |                |
| ≤75                                              | 10                               | 50                                  |                | 1.00 (reference)                    |                | 1.00 (reference)                      |                |
| >75                                              | 10                               | 32                                  | 0.02           | 2.72 (1.12–6.59)                    | 0.02           | 2.97 (1.15–7.68)                      | 0.02           |
| Male sex                                         |                                  |                                     |                |                                     |                |                                       |                |
| No                                               | 7                                | 0                                   |                | 1.00 (reference)                    |                | –                                     |                |
| Yes                                              | 13                               | 57                                  | 0.08           | 0.44 (0.17–1.14)                    | 0.09           | –                                     | –              |
| Charlson comorbidities<br>index score            |                                  |                                     |                |                                     |                |                                       |                |
| ≤3                                               | 11                               | 60                                  |                | 1.00 (reference)                    |                | –                                     |                |
| >3                                               | 9                                | 27                                  | 0.12           | 1.98 (0.81–4.84)                    | 0.13           | –                                     | –              |
| Hypertension                                     |                                  |                                     |                |                                     |                |                                       |                |
| No                                               | 10                               | 35                                  |                | 1.00 (reference)                    |                | –                                     |                |
| Yes                                              | 10                               | 54                                  | 0.71           | 1.17 (0.48–2.83)                    | 0.71           | –                                     | –              |
| COVID-19 severity status                         |                                  |                                     |                |                                     |                |                                       |                |
| Moderate                                         | 4                                | 74                                  |                | 1.00 (reference)                    |                | –                                     |                |
| Severe                                           | 11                               | 55                                  |                | 0.89 (0.28–2.86)                    | 0.85           | –                                     |                |
| Critical                                         | 5                                | 38                                  | 0.68           | 1.37 (0.35–5.26)                    | 0.64           | –                                     | –              |
| SOFA score                                       |                                  |                                     |                |                                     |                |                                       |                |
| ≤2                                               | 3                                | 80                                  |                | 1.00 (reference)                    |                | –                                     |                |
| >2                                               | 17                               | 48                                  | 0.37           | 1.71 (0.50–5.87)                    | 0.38           | –                                     | –              |
| C-reactive protein, mg/L                         |                                  |                                     |                |                                     |                |                                       |                |
| ≤90                                              | 4                                | 52                                  |                | 1.00 (reference)                    |                | 1.00 (reference)                      |                |
| >90                                              | 16                               | 39                                  | 0.02           | 3.41 (1.12–10.32)                   | 0.03           | 2.44 (0.72–8.25)                      | 0.15           |
| Procalcitonin, pg/mL                             |                                  |                                     |                |                                     |                |                                       |                |
| ≤2                                               | 13                               | 58                                  |                | 1.00 (reference)                    |                | –                                     |                |
| >2                                               | 7                                | 20                                  | 0.06           | 2.33 (0.91–5.95)                    | 0.08           | –                                     | –              |
| Interleukin 6, pg/mL                             |                                  |                                     |                |                                     |                |                                       |                |
| ≤200                                             | 12                               | 37                                  |                | 1.00 (reference)                    |                | –                                     |                |
| >200                                             | 8                                | 52                                  | 0.80           | 0.89 (0.36–2.19)                    | 0.80           | –                                     | –              |
| Septic shock                                     |                                  |                                     |                |                                     |                |                                       |                |
| No                                               | 8                                | 74                                  |                | 1.00 (reference)                    |                | 1.00 (reference)                      |                |
| Yes                                              | 12                               | 0                                   | <0.001         | 5.10 (2.07–12.61)                   | <0.001         | 6.55 (2.36–18.23)                     | <0.001         |
| Respiratory source of<br>infection               |                                  |                                     |                |                                     |                |                                       |                |
| No                                               | 13                               | 39                                  |                | 1.00 (reference)                    |                | –                                     |                |
| Yes                                              | 7                                | 51                                  | 0.07           | 0.43 (0.17–1.12)                    | 0.09           | –                                     | –              |
| Recurrent infection                              |                                  |                                     |                |                                     |                |                                       |                |
| No                                               | 19                               | 38                                  |                | 1.00 (reference)                    |                | –                                     |                |
| Yes                                              | 1                                | 80                                  | 0.17           | 0.27 (0.03–2.03)                    | 0.20           | –                                     | –              |
| ICU-acquired infection                           |                                  |                                     |                |                                     |                |                                       |                |
| No                                               | 8                                | 47                                  |                | 1.00 (reference)                    |                | –                                     |                |
| Yes                                              | 12                               | 46                                  | 0.57           | 0.76 (0.30–1.93)                    | 0.57           | –                                     | –              |
| Time to infection onset,<br>days                 |                                  |                                     |                |                                     |                |                                       |                |
| >3                                               | 13                               | 50                                  |                | 1.00 (reference)                    |                | 1.00 (reference)                      |                |
| ≤3                                               | 7                                | 36                                  | 0.001          | 4.96 (1.73–14.24)                   | 0.003          | 4.68 (1.40–15.63)                     | 0.01           |
| Inappropriate empirical<br>antimicrobial therapy |                                  |                                     |                |                                     |                |                                       |                |
| No                                               | 12                               | 33                                  |                | 1.00 (reference)                    |                | 1.00 (reference)                      |                |
| Yes                                              | 8                                | 59                                  | 0.66           | 0.82 (0.33–2.01)                    | 0.67           | 1.30 (0.42–4.03)                      | 0.65           |
| ICU admission                                    |                                  |                                     |                |                                     |                |                                       |                |
| No                                               | 3                                | 69                                  |                | 1.00 (reference)                    |                | –                                     |                |
| Yes                                              | 17                               | 43                                  | 0.95           | 0.96 (0.27–3.38)                    | 0.95           | –                                     | –              |
| GP bacterial infection                           |                                  |                                     |                |                                     |                |                                       |                |
| No                                               | 6                                | 34                                  |                | 1.00 (reference)                    |                | –                                     |                |
| Yes                                              | 14                               | 55                                  | 0.56           | 0.75 (0.28–2.00)                    | 0.57           | –                                     | –              |
| GN bacterial infection                           |                                  |                                     |                |                                     |                |                                       |                |
| No                                               | 10                               | 60                                  |                | 1.00 (reference)                    |                | –                                     |                |
| Yes                                              | 10                               | 35                                  | 0.50           | 1.34 (0.55–3.27)                    | 0.51           | –                                     | –              |
| Yeast infection                                  |                                  |                                     |                |                                     |                |                                       |                |
| No                                               | 16                               | 55                                  |                | 1.00 (reference)                    |                | –                                     |                |
| Yes                                              | 4                                | 0                                   | 0.78           | 0.78 (0.38–3.50)                    | 0.78           | –                                     | –              |
| Antimicrobial-resistant<br>infection             |                                  |                                     |                |                                     |                |                                       |                |
| No                                               | 9                                | 57                                  |                | 1.00 (reference)                    |                | 1.00 (reference)                      |                |
| Yes                                              | 11                               | 35                                  | 0.72           | 1.17 (0.48–2.83)                    | 0.72           | 0.80 (0.30–2.14)                      | 0.66           |

COVID-19, coronavirus disease 2019; SOFA, sequential organ failure assessment; ICU, intensive care unit; GP, Gram-positive; GN, Gram-negative. *P* values of <0.05 are considered to be statistically significant.

<sup>a</sup> Measured during stay in or at discharge from the hospital for 46 COVID-19 patients who developed bloodstream infection.
